# Supplementary material
Source: PubMed Central journal article supplement (PMC2800272)
Supplement: kwp309_1.pdf [file kwp309_1.pdf]

**1900 Cohort -- born 1895 -- 1904**

| Age | score alive male | score alive female | Score dead male | Score dead female |
|-----|------------------|--------------------|-----------------|-------------------|
| 40  | -0.3662          | -0.4039            | -1.004          | -0.993            |
| 41  | -0.3662          | -0.4039            | -0.998          | -0.988            |
| 42  | -0.3121          | -0.4039            | -0.991          | -0.984            |
| 43  | -0.3121          | -0.4039            | -0.985          | -0.979            |
| 44  | -0.3121          | -0.4039            | -0.978          | -0.974            |
| 45  | -0.3121          | -0.3565            | -0.971          | -0.969            |
| 46  | -0.3121          | -0.3565            | -0.963          | -0.964            |
| 47  | -0.2531          | -0.3565            | -0.955          | -0.958            |
| 48  | -0.2531          | -0.3565            | -0.946          | -0.952            |
| 49  | -0.2531          | -0.3565            | -0.937          | -0.946            |
| 50  | -0.2531          | -0.3565            | -0.926          | -0.940            |
| 51  | -0.1907          | -0.3057            | -0.915          | -0.934            |
| 52  | -0.1907          | -0.3057            | -0.903          | -0.926            |
| 53  | -0.1907          | -0.3057            | -0.890          | -0.919            |
| 54  | -0.1907          | -0.3057            | -0.876          | -0.911            |
| 55  | -0.1262          | -0.3057            | -0.861          | -0.902            |
| 56  | -0.1262          | -0.2479            | -0.845          | -0.894            |
| 57  | -0.1262          | -0.2479            | -0.828          | -0.885            |
| 58  | -0.0582          | -0.2479            | -0.810          | -0.875            |
| 59  | -0.0582          | -0.2479            | -0.790          | -0.864            |
| 60  | -0.0582          | -0.1859            | -0.768          | -0.853            |
| 61  | 0.0151           | -0.1859            | -0.744          | -0.841            |
| 62  | 0.0151           | -0.1859            | -0.718          | -0.827            |
| 63  | 0.09292          | -0.1859            | -0.689          | -0.813            |
| 64  | 0.09292          | -0.1192            | -0.657          | -0.796            |
| 65  | 0.09292          | -0.1192            | -0.624          | -0.780            |
| 66  | 0.17627          | -0.1192            | -0.588          | -0.761            |
| 67  | 0.17627          | -0.0435            | -0.549          | -0.742            |
| 68  | 0.26371          | -0.0435            | -0.508          | -0.721            |
| 69  | 0.26371          | -0.0435            | -0.463          | -0.699            |
| 70  | 0.36028          | 0.03968            | -0.416          | -0.676            |

**1910 Cohort -- born 1905 -- 1914**

| Age | score alive male | score alive female | Score dead male | Score dead female |
|-----|------------------|--------------------|-----------------|-------------------|
| 40  | -0.3697          | -0.4484            | -0.9942         | -1.0007           |
| 41  | -0.3697          | -0.4484            | -0.9898         | -0.9977           |
| 42  | -0.3206          | -0.4484            | -0.985          | -0.9945           |
| 43  | -0.3206          | -0.4484            | -0.9798         | -0.9912           |
| 44  | -0.3206          | -0.4002            | -0.9742         | -0.9877           |
| 45  | -0.3206          | -0.4002            | -0.9685         | -0.9842           |
| 46  | -0.3206          | -0.4002            | -0.9623         | -0.9805           |
| 47  | -0.3206          | -0.4002            | -0.9555         | -0.9765           |
| 48  | -0.2663          | -0.4002            | -0.9479         | -0.9722           |
| 49  | -0.2663          | -0.4002            | -0.9397         | -0.9675           |
| 50  | -0.2663          | -0.4002            | -0.9305         | -0.9626           |
| 51  | -0.2663          | -0.3481            | -0.9202         | -0.9571           |
| 52  | -0.2082          | -0.3481            | -0.9091         | -0.9512           |
| 53  | -0.2082          | -0.3481            | -0.8967         | -0.9448           |
| 54  | -0.2082          | -0.3481            | -0.8833         | -0.9379           |
| 55  | -0.2082          | -0.3481            | -0.8691         | -0.9307           |
| 56  | -0.1453          | -0.2915            | -0.8538         | -0.9232           |
| 57  | -0.1453          | -0.2915            | -0.8369         | -0.9151           |
| 58  | -0.1453          | -0.2915            | -0.8186         | -0.9063           |
| 59  | -0.0779          | -0.2915            | -0.7981         | -0.8964           |
| 60  | -0.0779          | -0.2915            | -0.776          | -0.8859           |
| 61  | -0.0055          | -0.2292            | -0.7522         | -0.8746           |
| 62  | -0.0055          | -0.2292            | -0.7272         | -0.8626           |
| 63  | -0.0055          | -0.2292            | -0.6998         | -0.8498           |
| 64  | 0.07291          | -0.2292            | -0.6708         | -0.8362           |
| 65  | 0.07291          | -0.1578            | -0.6407         | -0.8219           |
| 66  | 0.15522          | -0.1578            | -0.609          | -0.8072           |
| 67  | 0.15522          | -0.1578            | -0.575          | -0.7913           |
| 68  | 0.2435           | -0.0789            | -0.5392         | -0.7742           |
| 69  | 0.2435           | -0.0789            | -0.5008         | -0.7558           |
| 70  | 0.33824          | -0.0789            | -0.4603         | -0.7361           |

**1920 Cohort -- born 1915 -- 1924**

| Age | score alive male | score alive female | Score dead male | Score dead female |
|-----|------------------|--------------------|-----------------|-------------------|
| 40  | -0.3832          | -0.4426            | -1.004          | -1.0041           |
| 41  | -0.3832          | -0.4426            | -1.0003         | -1.0018           |
| 42  | -0.3832          | -0.4426            | -0.9962         | -0.9993           |
| 43  | -0.3832          | -0.4426            | -0.9916         | -0.9966           |
| 44  | -0.3832          | -0.4426            | -0.9866         | -0.9936           |
| 45  | -0.334           | -0.4426            | -0.981          | -0.9903           |
| 46  | -0.334           | -0.4426            | -0.9749         | -0.9867           |
| 47  | -0.334           | -0.4426            | -0.9681         | -0.9828           |
| 48  | -0.334           | -0.3903            | -0.9606         | -0.9786           |
| 49  | -0.334           | -0.3903            | -0.9522         | -0.9739           |
| 50  | -0.2808          | -0.3903            | -0.9431         | -0.969            |
| 51  | -0.2808          | -0.3903            | -0.9333         | -0.9637           |
| 52  | -0.2808          | -0.3903            | -0.9229         | -0.9581           |
| 53  | -0.2808          | -0.3903            | -0.9116         | -0.9523           |
| 54  | -0.2234          | -0.3325            | -0.8996         | -0.9461           |
| 55  | -0.2234          | -0.3325            | -0.8868         | -0.9395           |
| 56  | -0.2234          | -0.3325            | -0.8733         | -0.9326           |
| 57  | -0.2234          | -0.3325            | -0.8589         | -0.9254           |
| 58  | -0.1616          | -0.3325            | -0.8439         | -0.9177           |
| 59  | -0.1616          | -0.3325            | -0.8278         | -0.9096           |
| 60  | -0.1616          | -0.267             | -0.8106         | -0.9009           |
| 61  | -0.0947          | -0.267             | -0.792          | -0.8913           |
| 62  | -0.0947          | -0.267             | -0.7723         | -0.881            |
| 63  | -0.0947          | -0.267             | -0.7511         | -0.8698           |
| 64  | -0.0212          | -0.1941            | -0.7281         | -0.8575           |
| 65  | -0.0212          | -0.1941            | -0.7032         | -0.8443           |
| 66  | 0.05758          | -0.1941            | -0.6763         | -0.83             |
| 67  | 0.05758          | -0.1941            | -0.6475         | -0.8143           |
| 68  | 0.05758          | -0.1128            | -0.6168         | -0.7975           |
| 69  | 0.14284          | -0.1128            | -0.5839         | -0.7798           |
| 70  | 0.14284          | -0.1128            | -0.5494         | -0.7607           |

|     |         |         |        |        |
|-----|---------|---------|--------|--------|
| 71  | 0.46286 | 0.03968 | -0.366 | -0.650 |
| 72  | 0.46286 | 0.03968 | -0.312 | -0.622 |
| 73  | 0.57092 | 0.13277 | -0.253 | -0.592 |
| 74  | 0.57092 | 0.13277 | -0.191 | -0.559 |
| 75  | 0.69138 | 0.23438 | -0.126 | -0.524 |
| 76  | 0.69138 | 0.23438 | -0.058 | -0.487 |
| 77  | 0.83544 | 0.34686 | 0.015  | -0.447 |
| 78  | 1.05463 | 0.34686 | 0.093  | -0.404 |
| 79  | 1.13798 | 0.34686 | 0.176  | -0.357 |
| 80  | 1.37677 | 0.47434 | 0.264  | -0.306 |
| 81  | 1.63617 | 0.47434 | 0.360  | -0.248 |
| 82  | 1.73874 | 0.60999 | 0.463  | -0.186 |
| 83  | 2.0293  | 0.60999 | 0.571  | -0.119 |
| 84  | 2.14976 | 0.7576  | 0.691  | -0.043 |
| 85  | 2.46915 | 0.95813 | 0.820  | 0.040  |
| 86  | 2.81513 | 1.05123 | 0.962  | 0.133  |
| 87  | 3.1858  | 1.32736 | 1.113  | 0.234  |
| 88  | 3.34863 | 1.43984 | 1.276  | 0.347  |
| 89  | 3.77003 | 1.77083 | 1.458  | 0.474  |
| 90  | 4.22752 | 2.13001 | 1.649  | 0.610  |
| 91  | 4.72438 | 2.27762 | 1.853  | 0.758  |
| 92  | 4.94371 | 2.68705 | 2.073  | 0.918  |
| 93  | 5.50257 | 3.13388 | 2.312  | 1.093  |
| 94  | 6.11567 | 3.3374  | 2.579  | 1.296  |
| 95  | 6.78362 | 3.86216 | 2.871  | 1.520  |
| 96  | 7.50405 | 4.43713 | 3.191  | 1.769  |
| 97  | 7.85009 | 5.07619 | 3.537  | 2.041  |
| 98  | 8.66002 | 5.77663 | 3.913  | 2.342  |
| 99  | 9.53512 | 6.10302 | 4.313  | 2.669  |
| 100 | 10.4679 | 6.89177 | 4.747  | 3.035  |
| 101 | 11.4781 | 7.75813 | 5.222  | 3.434  |
| 102 | 12.5897 | 8.68905 | 5.721  | 3.856  |
| 103 | 13.7443 | 9.70404 | 6.256  | 4.324  |
| 104 | 15.0505 | 10.8123 | 6.869  | 4.833  |
| 105 | 15.6696 | 12.0385 | 7.488  | 5.380  |
| 106 | 17.21   | 12.6378 | 8.181  | 5.980  |
| 107 | 18.4628 | 14.0093 | 9.029  | 6.658  |

|     |         |         |         |         |
|-----|---------|---------|---------|---------|
| 71  | 0.33824 | -0.0789 | -0.4163 | -0.7139 |
| 72  | 0.43975 | 0.00958 | -0.3697 | -0.6901 |
| 73  | 0.43975 | 0.00958 | -0.3206 | -0.6645 |
| 74  | 0.55362 | 0.1082  | -0.2663 | -0.636  |
| 75  | 0.55362 | 0.1082  | -0.2082 | -0.605  |
| 76  | 0.6765  | 0.1082  | -0.1453 | -0.571  |
| 77  | 0.6765  | 0.21783 | -0.0779 | -0.5337 |
| 78  | 0.81098 | 0.21783 | -0.0055 | -0.493  |
| 79  | 0.88389 | 0.34152 | 0.07291 | -0.4484 |
| 80  | 1.11252 | 0.34152 | 0.15522 | -0.4002 |
| 81  | 1.36165 | 0.34152 | 0.2435  | -0.3481 |
| 82  | 1.4564  | 0.48405 | 0.33824 | -0.2915 |
| 83  | 1.73252 | 0.48405 | 0.43975 | -0.2292 |
| 84  | 1.84639 | 0.6438  | 0.55362 | -0.1578 |
| 85  | 2.16558 | 0.6438  | 0.6765  | -0.0789 |
| 86  | 2.51405 | 0.83045 | 0.81098 | 0.00958 |
| 87  | 2.66036 | 1.12898 | 0.95729 | 0.1082  |
| 88  | 3.05311 | 1.23861 | 1.11815 | 0.21783 |
| 89  | 3.48728 | 1.58595 | 1.29277 | 0.34152 |
| 90  | 3.97018 | 1.72849 | 1.48908 | 0.48405 |
| 91  | 4.18417 | 2.13798 | 1.70306 | 0.6438  |
| 92  | 4.73246 | 2.59284 | 1.93495 | 0.82087 |
| 93  | 5.33973 | 2.79276 | 2.19451 | 1.02079 |
| 94  | 6.00562 | 3.32244 | 2.48111 | 1.24444 |
| 95  | 6.73118 | 3.90659 | 2.7975  | 1.49418 |
| 96  | 7.07889 | 4.54647 | 3.14522 | 1.77197 |
| 97  | 7.89755 | 5.23996 | 3.52451 | 2.078   |
| 98  | 8.77442 | 5.57438 | 3.93367 | 2.41241 |
| 99  | 9.70794 | 6.3531  | 4.37304 | 2.77449 |
| 100 | 10.7093 | 7.18615 | 4.84075 | 3.16196 |
| 101 | 11.7535 | 8.08102 | 5.33489 | 3.5786  |
| 102 | 12.8749 | 9.03638 | 5.86853 | 4.02419 |
| 103 | 14.0789 | 10.0664 | 6.41858 | 4.50241 |
| 104 | 15.2857 | 11.1658 | 7.00637 | 5.01219 |
| 105 | 15.9396 | 12.3627 | 7.66029 | 5.56398 |
| 106 | 17.406  | 13.6455 | 8.27933 | 6.15359 |
| 107 | 18.6587 | 14.2906 | 9.12663 | 6.79873 |

|     |         |         |         |         |
|-----|---------|---------|---------|---------|
| 71  | 0.23843 | -0.0218 | -0.5125 | -0.7402 |
| 72  | 0.23843 | -0.0218 | -0.4731 | -0.7179 |
| 73  | 0.34338 | -0.0218 | -0.4301 | -0.6935 |
| 74  | 0.34338 | 0.08019 | -0.3832 | -0.6665 |
| 75  | 0.45958 | 0.08019 | -0.334  | -0.6374 |
| 76  | 0.45958 | 0.08019 | -0.2808 | -0.6054 |
| 77  | 0.58837 | 0.19449 | -0.2234 | -0.5703 |
| 78  | 0.58837 | 0.19449 | -0.1616 | -0.5321 |
| 79  | 0.73126 | 0.19449 | -0.0947 | -0.49   |
| 80  | 0.73126 | 0.32271 | -0.0212 | -0.4426 |
| 81  | 0.94724 | 0.32271 | 0.05758 | -0.3903 |
| 82  | 1.03249 | 0.46661 | 0.14284 | -0.3325 |
| 83  | 1.30365 | 0.46661 | 0.23843 | -0.267  |
| 84  | 1.60271 | 0.62778 | 0.34338 | -0.1941 |
| 85  | 1.71892 | 0.62778 | 0.45958 | -0.1128 |
| 86  | 2.06222 | 0.80796 | 0.58837 | -0.0218 |
| 87  | 2.44153 | 1.08897 | 0.73126 | 0.08019 |
| 88  | 2.59993 | 1.20326 | 0.88966 | 0.19449 |
| 89  | 3.0356  | 1.55456 | 1.06522 | 0.32271 |
| 90  | 3.51531 | 1.69846 | 1.25934 | 0.46661 |
| 91  | 3.72983 | 2.10696 | 1.47386 | 0.62778 |
| 92  | 4.27923 | 2.55904 | 1.71027 | 0.80796 |
| 93  | 4.87932 | 3.05667 | 1.97038 | 1.00877 |
| 94  | 5.53264 | 3.27975 | 2.25598 | 1.23185 |
| 95  | 6.24048 | 3.84854 | 2.56896 | 1.47918 |
| 96  | 6.58046 | 4.4657  | 2.90894 | 1.75108 |
| 97  | 7.36626 | 5.13008 | 3.27667 | 2.04789 |
| 98  | 8.2054  | 5.8435  | 3.67152 | 2.36936 |
| 99  | 9.0885  | 6.18876 | 4.0896  | 2.71462 |
| 100 | 10.0321 | 6.97425 | 4.53388 | 3.08218 |
| 101 | 11.0106 | 7.81328 | 4.9989  | 3.47414 |
| 102 | 12.0627 | 8.70514 | 5.49818 | 3.89207 |
| 103 | 13.1785 | 9.66567 | 6.01174 | 4.33914 |
| 104 | 14.3818 | 10.6861 | 6.56453 | 4.81307 |
| 105 | 15.6772 | 11.7851 | 7.16671 | 5.32653 |
| 106 | 16.3277 | 12.9654 | 7.8173  | 5.87307 |
| 107 | 17.714  | 14.244  | 8.51044 | 6.45859 |

|     |         |         |        |        |
|-----|---------|---------|--------|--------|
| 108 | 19.5614 | 15.4562 | 9.434  | 7.351  |
| 109 | 21.6402 | 17.1908 | 10.127 | 8.105  |
| 110 | 21.6402 | 19.2702 | 10.127 | 9.086  |
| 111 | 21.6402 | 10.1844 | 10.127 | 10.184 |
| 112 | 21.6402 | 10.1844 | 10.127 | 10.184 |
| 113 | 21.6402 | 10.1844 | 10.127 | 10.184 |
| 114 | 21.6402 | 10.1844 | 10.127 | 10.184 |
| 115 | 21.6402 | 10.1844 | 10.127 | 10.184 |
| 116 | 21.6402 | 10.1844 | 10.127 | 10.184 |
| 117 | 21.6402 | 10.1844 | 10.127 | 10.184 |
| 118 | 21.6402 | 10.1844 | 10.127 | 10.184 |
| 119 | 21.6402 | 10.1844 | 10.127 | 10.184 |

|     |         |         |         |         |
|-----|---------|---------|---------|---------|
| 108 | 19.7573 | 15.6769 | 9.5321  | 7.49188 |
| 109 | 21.7382 | 17.3509 | 10.2252 | 8.18502 |
| 110 | 21.7382 | 19.4303 | 10.2252 | 9.16585 |
| 111 | 21.7382 | 20.5289 | 10.2252 | 10.2645 |
| 112 | 21.7382 | 20.5289 | 10.2252 | 10.2645 |
| 113 | 21.7382 | 20.5289 | 10.2252 | 10.2645 |
| 114 | 21.7382 | 20.5289 | 10.2252 | 10.2645 |
| 115 | 21.7382 | 20.5289 | 10.2252 | 10.2645 |
| 116 | 21.7382 | 20.5289 | 10.2252 | 10.2645 |
| 117 | 21.7382 | 20.5289 | 10.2252 | 10.2645 |
| 118 | 21.7382 | 20.5289 | 10.2252 | 10.2645 |
| 119 | 21.7382 | 20.5289 | 10.2252 | 10.2645 |

|     |         |         |         |         |
|-----|---------|---------|---------|---------|
| 108 | 18.8126 | 14.8778 | 9.20359 | 7.09231 |
| 109 | 19.9113 | 16.3441 | 9.60906 | 7.78546 |
| 110 | 10.3022 | 17.8104 | 10.3022 | 8.55865 |
| 111 | 10.3022 | 19.6022 | 10.3022 | 9.25179 |
| 112 | 10.3022 | 19.6022 | 10.3022 | 10.3504 |
| 113 | 10.3022 | 19.6022 | 10.3022 | 10.3504 |
| 114 | 10.3022 | 19.6022 | 10.3022 | 10.3504 |
| 115 | 10.3022 | 19.6022 | 10.3022 | 10.3504 |
| 116 | 10.3022 | 19.6022 | 10.3022 | 10.3504 |
| 117 | 10.3022 | 19.6022 | 10.3022 | 10.3504 |
| 118 | 10.3022 | 19.6022 | 10.3022 | 10.3504 |
| 119 | 10.3022 | 19.6022 | 10.3022 | 10.3504 |

**1930 Cohort -- born 1925 -- 1934**

| Age | score alive males | score alive females | Score dead male | Score dead female |
|-----|-------------------|---------------------|-----------------|-------------------|
| 40  | -0.4247           | -0.4735             | -0.996          | -1.005            |
| 41  | -0.3785           | -0.4735             | -0.992          | -1.003            |
| 42  | -0.3785           | -0.4226             | -0.988          | -1.000            |
| 43  | -0.3785           | -0.4226             | -0.983          | -0.998            |
| 44  | -0.3785           | -0.4226             | -0.979          | -0.995            |
| 45  | -0.3785           | -0.4226             | -0.973          | -0.992            |
| 46  | -0.3785           | -0.4226             | -0.968          | -0.989            |
| 47  | -0.3785           | -0.4226             | -0.962          | -0.986            |
| 48  | -0.3282           | -0.4226             | -0.956          | -0.982            |
| 49  | -0.3282           | -0.4226             | -0.949          | -0.979            |
| 50  | -0.3282           | -0.4226             | -0.942          | -0.975            |
| 51  | -0.3282           | -0.366              | -0.934          | -0.971            |
| 52  | -0.3282           | -0.366              | -0.926          | -0.966            |
| 53  | -0.2734           | -0.366              | -0.917          | -0.961            |
| 54  | -0.2734           | -0.366              | -0.908          | -0.956            |
| 55  | -0.2734           | -0.366              | -0.897          | -0.951            |
| 56  | -0.2734           | -0.366              | -0.886          | -0.945            |
| 57  | -0.2135           | -0.3032             | -0.874          | -0.938            |
| 58  | -0.2135           | -0.3032             | -0.862          | -0.931            |
| 59  | -0.2135           | -0.3032             | -0.848          | -0.924            |
| 60  | -0.1477           | -0.3032             | -0.833          | -0.915            |
| 61  | -0.1477           | -0.3032             | -0.817          | -0.906            |
| 62  | -0.1477           | -0.3032             | -0.800          | -0.897            |
| 63  | -0.1477           | -0.2333             | -0.782          | -0.886            |
| 64  | -0.0754           | -0.2333             | -0.763          | -0.875            |
| 65  | -0.0754           | -0.2333             | -0.741          | -0.863            |
| 66  | -0.0754           | -0.2333             | -0.719          | -0.850            |
| 67  | 0.00439           | -0.1556             | -0.694          | -0.835            |
| 68  | 0.00439           | -0.1556             | -0.668          | -0.820            |
| 69  | 0.09272           | -0.1556             | -0.640          | -0.803            |
| 70  | 0.09272           | -0.0689             | -0.611          | -0.785            |

**1940 Cohort -- born 1935 -- 1944**

| Age | score alive males | score alive females | Score dead male | Score dead female |
|-----|-------------------|---------------------|-----------------|-------------------|
| 40  | -0.4332           | -0.4638             | -1.0046         | -1.0025           |
| 41  | -0.4332           | -0.4638             | -1.0016         | -1.0009           |
| 42  | -0.4332           | -0.4638             | -0.9984         | -0.9991           |
| 43  | -0.4332           | -0.4121             | -0.9951         | -0.9973           |
| 44  | -0.3833           | -0.4121             | -0.9916         | -0.9953           |
| 45  | -0.3833           | -0.4121             | -0.9877         | -0.9932           |
| 46  | -0.3833           | -0.4121             | -0.9834         | -0.9908           |
| 47  | -0.3833           | -0.4121             | -0.9789         | -0.9883           |
| 48  | -0.3833           | -0.4121             | -0.9739         | -0.9855           |
| 49  | -0.3833           | -0.4121             | -0.9685         | -0.9825           |
| 50  | -0.3833           | -0.4121             | -0.9626         | -0.9793           |
| 51  | -0.3286           | -0.4121             | -0.9563         | -0.9757           |
| 52  | -0.3286           | -0.4121             | -0.9497         | -0.9719           |
| 53  | -0.3286           | -0.3546             | -0.9425         | -0.9678           |
| 54  | -0.3286           | -0.3546             | -0.9345         | -0.9632           |
| 55  | -0.3286           | -0.3546             | -0.926          | -0.9583           |
| 56  | -0.2687           | -0.3546             | -0.9169         | -0.9529           |
| 57  | -0.2687           | -0.3546             | -0.9072         | -0.9472           |
| 58  | -0.2687           | -0.3546             | -0.8969         | -0.9409           |
| 59  | -0.2687           | -0.3546             | -0.8858         | -0.9341           |
| 60  | -0.203            | -0.2905             | -0.8739         | -0.9267           |
| 61  | -0.203            | -0.2905             | -0.8611         | -0.9187           |
| 62  | -0.203            | -0.2905             | -0.8474         | -0.9101           |
| 63  | -0.203            | -0.2905             | -0.8326         | -0.9005           |
| 64  | -0.1303           | -0.2905             | -0.8166         | -0.8901           |
| 65  | -0.1303           | -0.2187             | -0.7993         | -0.8787           |
| 66  | -0.1303           | -0.2187             | -0.7805         | -0.8662           |
| 67  | -0.0498           | -0.2187             | -0.7601         | -0.8526           |
| 68  | -0.0498           | -0.2187             | -0.7379         | -0.8376           |
| 69  | -0.0498           | -0.1381             | -0.7139         | -0.8214           |
| 70  | 0.0401            | -0.1381             | -0.6879         | -0.8037           |

|     |         |         |        |        |     |         |         |         |         |
|-----|---------|---------|--------|--------|-----|---------|---------|---------|---------|
| 71  | 0.09272 | -0.0689 | -0.579 | -0.765 | 71  | 0.0401  | -0.1381 | -0.6597 | -0.7844 |
| 72  | 0.19073 | -0.0689 | -0.545 | -0.743 | 72  | 0.0401  | -0.0476 | -0.6289 | -0.7632 |
| 73  | 0.19073 | -0.0689 | -0.508 | -0.719 | 73  | 0.14075 | -0.0476 | -0.5956 | -0.7403 |
| 74  | 0.29973 | 0.02801 | -0.468 | -0.693 | 74  | 0.14075 | -0.0476 | -0.5596 | -0.7153 |
| 75  | 0.29973 | 0.02801 | -0.425 | -0.664 | 75  | 0.25339 | 0.0539  | -0.5209 | -0.6884 |
| 76  | 0.42103 | 0.13656 | -0.378 | -0.633 | 76  | 0.25339 | 0.0539  | -0.4789 | -0.659  |
| 77  | 0.42103 | 0.13656 | -0.328 | -0.599 | 77  | 0.37914 | 0.0539  | -0.4332 | -0.6268 |
| 78  | 0.55595 | 0.13656 | -0.273 | -0.561 | 78  | 0.37914 | 0.16768 | -0.3833 | -0.5915 |
| 79  | 0.55595 | 0.25815 | -0.213 | -0.519 | 79  | 0.37914 | 0.16768 | -0.3286 | -0.5529 |
| 80  | 0.70573 | 0.25815 | -0.148 | -0.474 | 80  | 0.51905 | 0.2949  | -0.2687 | -0.5105 |
| 81  | 0.70573 | 0.39424 | -0.075 | -0.423 | 81  | 0.51905 | 0.2949  | -0.203  | -0.4638 |
| 82  | 0.87595 | 0.39424 | 0.004  | -0.366 | 82  | 0.6741  | 0.2949  | -0.1303 | -0.4121 |
| 83  | 0.96428 | 0.5462  | 0.093  | -0.303 | 83  | 0.84538 | 0.43681 | -0.0498 | -0.3546 |
| 84  | 1.24554 | 0.5462  | 0.191  | -0.233 | 84  | 0.88547 | 0.43681 | 0.0401  | -0.2905 |
| 85  | 1.35455 | 0.71561 | 0.300  | -0.156 | 85  | 1.1747  | 0.59482 | 0.14075 | -0.2187 |
| 86  | 1.67782 | 0.71561 | 0.421  | -0.069 | 86  | 1.28734 | 0.59482 | 0.25339 | -0.1381 |
| 87  | 2.03497 | 0.93197 | 0.556  | 0.028  | 87  | 1.62024 | 0.7703  | 0.37914 | -0.0476 |
| 88  | 2.18475 | 1.04052 | 0.706  | 0.137  | 88  | 1.98736 | 1.01877 | 0.51905 | 0.0539  |
| 89  | 2.59443 | 1.37095 | 0.872  | 0.258  | 89  | 2.14242 | 1.13255 | 0.6741  | 0.16768 |
| 90  | 3.04475 | 1.73811 | 1.055  | 0.394  | 90  | 2.56244 | 1.47498 | 0.84538 | 0.2949  |
| 91  | 3.53896 | 1.89007 | 1.257  | 0.546  | 91  | 3.02334 | 1.85337 | 1.03395 | 0.43681 |
| 92  | 3.76119 | 2.3134  | 1.479  | 0.716  | 92  | 3.52634 | 2.01137 | 1.24111 | 0.59482 |
| 93  | 4.3228  | 2.77857 | 1.723  | 0.904  | 93  | 3.75355 | 2.44442 | 1.46832 | 0.7703  |
| 94  | 4.93266 | 3.28664 | 1.990  | 1.113  | 94  | 4.32144 | 2.91763 | 1.71707 | 0.96487 |
| 95  | 5.59242 | 3.51771 | 2.282  | 1.344  | 95  | 4.93551 | 3.13284 | 1.98939 | 1.18008 |
| 96  | 6.30018 | 4.0928  | 2.600  | 1.598  | 96  | 5.59367 | 3.66802 | 2.28523 | 1.41656 |
| 97  | 6.64297 | 4.71144 | 2.943  | 1.875  | 97  | 6.2949  | 4.24309 | 2.60437 | 1.67412 |
| 98  | 7.42045 | 5.37429 | 3.310  | 2.174  | 98  | 7.03964 | 4.85936 | 2.94612 | 1.95276 |
| 99  | 8.24524 | 6.08237 | 3.700  | 2.495  | 99  | 7.40196 | 5.51784 | 3.30844 | 2.25147 |
| 100 | 9.11101 | 6.42418 | 4.110  | 2.837  | 100 | 8.20915 | 6.2186  | 3.69053 | 2.56897 |
| 101 | 10.0319 | 7.20158 | 4.545  | 3.200  | 101 | 9.06251 | 6.96453 | 4.09352 | 2.9066  |
| 102 | 10.9935 | 8.02791 | 5.001  | 3.587  | 102 | 9.96207 | 7.3243  | 4.51862 | 3.26637 |
| 103 | 12.0204 | 8.91272 | 5.487  | 4.001  | 103 | 10.9114 | 8.14427 | 4.96899 | 3.64962 |
| 104 | 13.0967 | 9.85334 | 5.993  | 4.441  | 104 | 11.9165 | 9.01942 | 5.44345 | 4.05793 |
| 105 | 14.2565 | 10.8653 | 6.533  | 4.912  | 105 | 12.9602 | 9.95438 | 5.94244 | 4.49465 |
| 106 | 15.5202 | 11.938  | 7.104  | 5.413  | 106 | 14.0856 | 10.9484 | 6.47307 | 4.96148 |
| 107 | 16.6989 | 13.092  | 7.723  | 5.954  | 107 | 15.3234 | 12.0181 | 7.0178  | 5.45973 |

|     |         |         |        |        |
|-----|---------|---------|--------|--------|
| 108 | 17.392  | 14.3566 | 8.416  | 6.525  |
| 109 | 18.6448 | 14.9697 | 8.976  | 7.138  |
| 110 | 20.0311 | 16.4361 | 9.669  | 7.831  |
| 111 | 10.3621 | 17.9024 | 10.362 | 8.605  |
| 112 | 10.3621 | 19.6942 | 10.362 | 9.298  |
| 113 | 10.3621 | 20.7928 | 10.362 | 10.396 |
| 114 | 10.3621 | 20.7928 | 10.362 | 10.396 |
| 115 | 10.3621 | 20.7928 | 10.362 | 10.396 |
| 116 | 10.3621 | 20.7928 | 10.362 | 10.396 |
| 117 | 10.3621 | 20.7928 | 10.362 | 10.396 |
| 118 | 10.3621 | 20.7928 | 10.362 | 10.396 |
| 119 | 10.3621 | 20.7928 | 10.362 | 10.396 |

|     |         |         |         |         |
|-----|---------|---------|---------|---------|
| 108 | 16.6113 | 13.1583 | 7.6125  | 5.98689 |
| 109 | 17.3044 | 14.4229 | 8.30565 | 6.55834 |
| 110 | 18.6907 | 15.036  | 8.9988  | 7.17145 |
| 111 | 18.6907 | 16.3482 | 9.69194 | 7.86459 |
| 112 | 18.6907 | 17.8146 | 9.69194 | 8.48363 |
| 113 | 18.6907 | 19.7605 | 9.69194 | 9.33093 |
| 114 | 18.6907 | 19.7605 | 9.69194 | 10.4295 |
| 115 | 18.6907 | 19.7605 | 9.69194 | 10.4295 |
| 116 | 18.6907 | 19.7605 | 9.69194 | 10.4295 |
| 117 | 18.6907 | 19.7605 | 9.69194 | 10.4295 |
| 118 | 18.6907 | 19.7605 | 9.69194 | 10.4295 |
| 119 | 18.6907 | 19.7605 | 9.69194 | 10.4295 |
